# Supplementary material for: Ratiometric electrochemical sensor for accurate detection of salicylic acid in leaves of living plants
Source: Royal Society of Chemistry journal article supplement (doi:10.1039/d0ra05813k), 2020-01-01

## Supporting information

### 2. Experimental section

Buffer recipes (for 1L solution) used in optimization experiment for different buffer:

0.05M Tris-HCl: 6.05g Tris, 0.1M HCl, adjusted pH to 7.0.

0.05M PB: 8.9g Na<sub>2</sub>HPO<sub>4</sub>•2H<sub>2</sub>O, 7.8g NaH<sub>2</sub>PO<sub>4</sub>•2H<sub>2</sub>O, dissolved in water, adjusted pH to 7.0.

0.05M PBS: 8.9g Na<sub>2</sub>HPO<sub>4</sub>•2H<sub>2</sub>O, 7.8g NaH<sub>2</sub>PO<sub>4</sub>•2H<sub>2</sub>O, 8.775g NaCl, dissolved in water, adjusted pH to 7.0.

0.05M Na<sub>2</sub>HPO<sub>4</sub>-citric acid: 8.9g Na<sub>2</sub>HPO<sub>4</sub>•2H<sub>2</sub>O, 0.1M citric acid, adjusted pH to 7.0.

0.05M KH<sub>2</sub>PO<sub>4</sub>-NaOH: 6.8g KH<sub>2</sub>PO<sub>3</sub>, 0.1M NaOH, adjusted pH to 7.0.

### 3. Results and discussion

**Fig. S1 DPV curves of Cu-MOFs-Nafion/SPE in the absence (a) or presence of 400μM SA.**

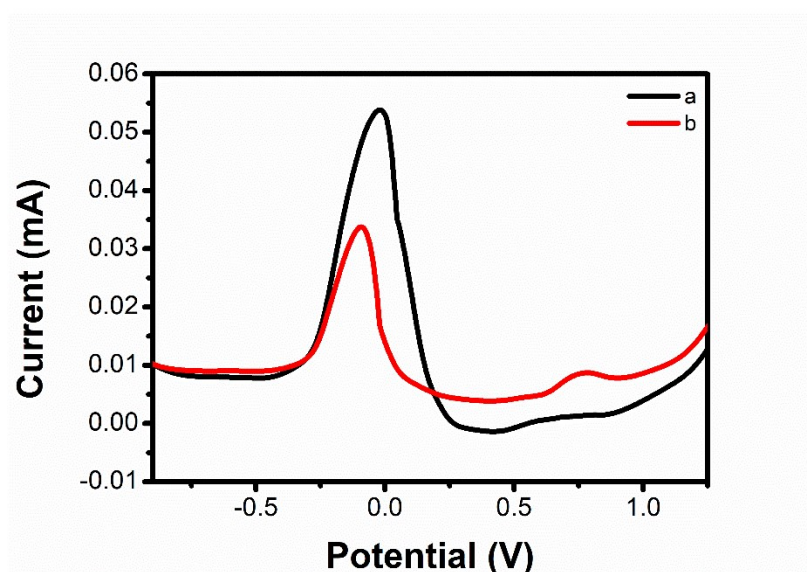

Fig S2: Effects of ratio of Cu-MOFs and KB (A), types of buffer (B) and concentration of buffer (C) on the ratiometric peak current intensities ( $I_{SA}/I_{Cu-MOF}$ ) from DPV measurements of Cu-MOFs-KB-Nafion/SPE in the presence of 400  $\mu$ M SA. (Error bar=SD; n=5).

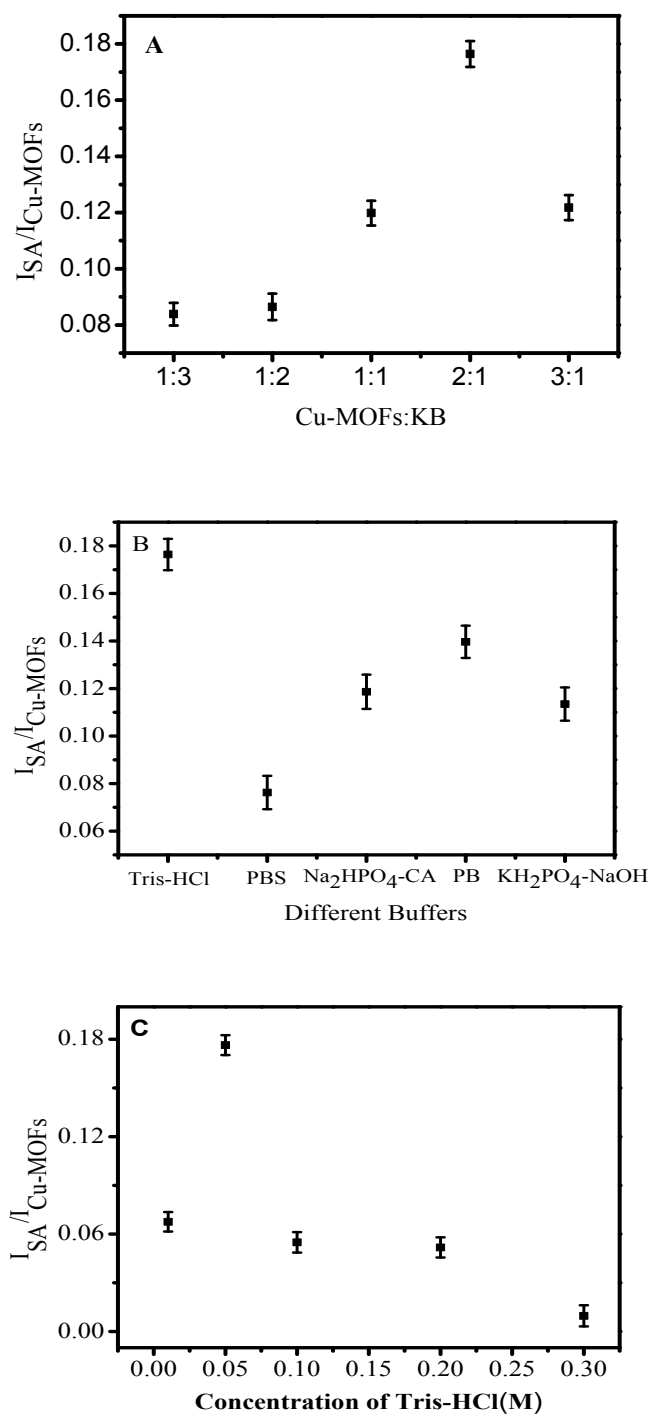

Fig S3 Stability for the Cu-MOFs-KB-Nafion/SPE sensor.

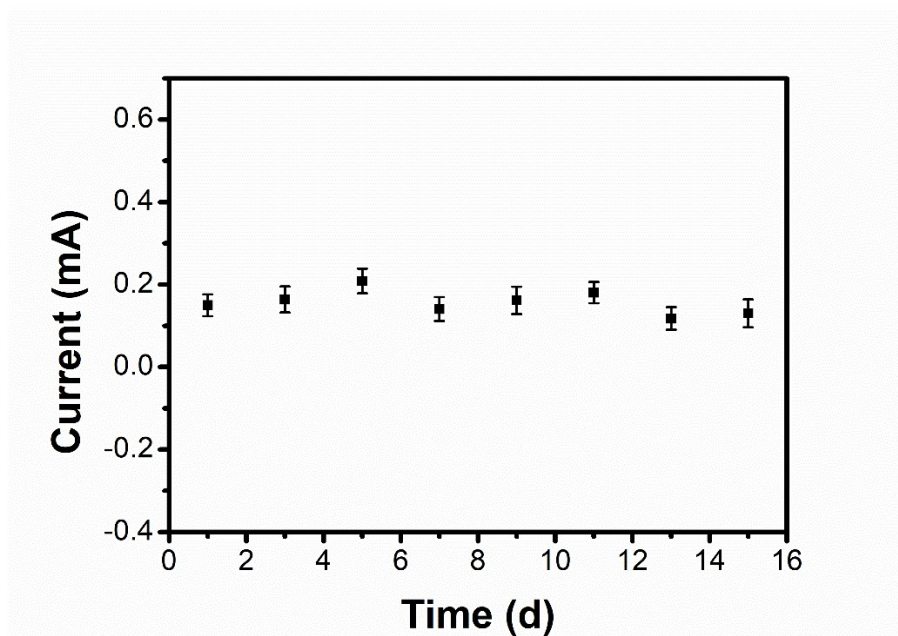

Fig.S4 The photograph for the in vivo detection of IAA.

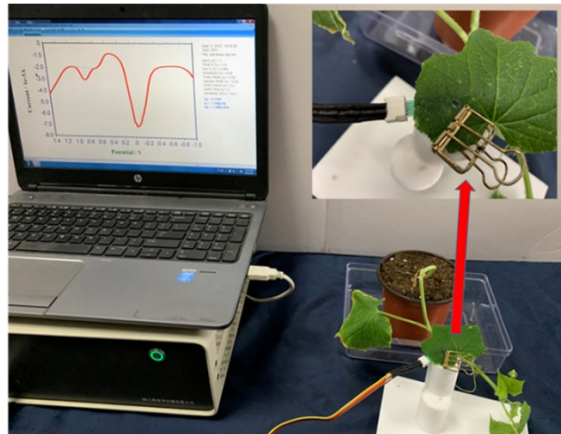

Supplement: d0ra05813k1.pdf [file d0ra05813k1.pdf]
